# Supplementary material
Source: publisher site journal article supplement (https://www.dovepress.com/article/463965)
Supplement: Supplementary file 1 [file get_supplementary_file.php]

**Supplement 1.** The geographical distribution of Thai population (n = 211)

| **Thai population / five regional groups** | **n (%)** |
| --- | --- |
| Thais | 211 (100.00) |
| Central | 158 (74.88) |
| Northeastern | 27 (12.80) |
| Southern | 11 (5.21) |
| Northern | 8 (3.79) |
| Eastern | 7 (3.32) |
